# Supplementary material
Source: Research Square preprint supplement (doi:10.21203/rs.3.rs-9420665/v1)
Supplement: Supplementary file 1 [file e339d9e9c2e2492fa080b75a.docx]

**Table S1. *C. albicans* strains used in this study**

| **Strain** | **Parent** | **Relevant genotypes** | **Source** |
| --- | --- | --- | --- |
| BWP17 | CAI4 | *ura3/ura3 his1∆/his1∆ arg4∆/arg4∆* | Wilson et  al. (1999) |
| LC101 | BWP17 | *ura3Δ/ura3Δ sec3Δ::HIS1/sec3Δ::ARG4* | This study |
| LC102 | LC101 | *sec3Δ1-316-URA3/ura3Δ sec3Δ::HIS1/sec3Δ::ARG4* | This study |
| LC103 | LC101 | *sec3Δ1-157-URA3/ura3Δ sec3Δ::HIS1/sec3Δ::ARG4* | This study |
| LC104 | LC101 | *sec3Δ158-244-URA3/ura3Δ sec3Δ::HIS1/sec3Δ::ARG4* | This study |
| LC105 | LC101 | *sec3Δ245-316-URA3/ura3Δ sec3Δ::HIS1/sec3Δ::ARG4* | This study |
| LC106 | LC101 | *sec3Δ317-790-URA3/ura3Δ sec3Δ::HIS1/sec3Δ::ARG4* | This study |
| LC107 | BWP17 | *ura3Δ/ura3Δ his1Δ/his1Δ RHO1/rho1Δ::ARG4* | This study |
| LC108 | LC107 | *ura3Δ/ura3Δ rho1::HIS1-rho1G18V/rho1Δ::ARG4* | This study |
| LC109 | LC107 | *ura3Δ/ura3Δ rho1::HIS1-rho1D124A/rho1Δ::ARG4* | This study |
| LC110 | LC109 | *RHO1-URA3/ura3Δ rho1::HIS1-rho1D124A/rho1Δ::ARG4* | This study |
| LC111 | BWP17 | *SEC5-3GFP-URA3/ura3Δ his1Δ/his1Δ arg4Δ/arg4Δ* | This study |
| LC112 | BWP17 | *SEC8-3GFP-URA3/ura3Δ his1Δ/his1Δ arg4Δ/arg4Δ* | This study |
| LC113 | BWP17 | *EXO70-3GFP-URA3/ura3Δ his1Δ/his1Δ arg4Δ/arg4Δ* | This study |
| LC114 | BWP17 | *EXO84-3GFP-URA3/ura3Δ his1Δ/his1Δ arg4Δ/arg4Δ* | This study |
| LC115 | LC101 | *SEC5-3GFP-URA3/ura3Δ sec3Δ::HIS1/sec3Δ::ARG4* | This study |
| LC116 | LC101 | *SEC8-3GFP-URA3/ura3Δ sec3Δ::HIS1/sec3Δ::ARG4* | This study |
| LC117 | LC101 | *EXO70-3GFP-URA3/ura3Δ sec3Δ::HIS1/sec3Δ::ARG4* | This study |
| LC118 | LC101 | *EXO84-3GFP-URA3/ura3Δ sec3Δ::HIS1/sec3Δ::ARG4* | This study |
| LC119 | LC101 | *SEC5-3GFP-sec3Δ1-316-URA3/ura3Δ sec3Δ::HIS1/sec3Δ::ARG4* | This study |
| LC120 | LC101 | *SEC8-3GFP-sec3Δ1-316-URA3/ura3Δ sec3Δ::HIS1/sec3Δ::ARG4* | This study |
| LC121 | LC101 | *EXO70-3GFP-sec3Δ1-316-URA3/ura3Δ sec3Δ::HIS1/sec3Δ::ARG4* | This study |
| LC122 | LC101 | *EXO84-3GFP-sec3Δ1-316-URA3/ura3Δ sec3Δ::HIS1/sec3Δ::ARG4* | This study |
| LC123 | LC101 | *SEC5-3GFP-sec3Δ1-157-URA3/ura3Δ sec3Δ::HIS1/sec3Δ::ARG4* | This study |
| LC124 | LC101 | *SEC8-3GFP-sec3Δ1-157-URA3/ura3Δ sec3Δ::HIS1/sec3Δ::ARG4* | This study |
| LC125 | LC101 | *EXO70-3GFP-sec3Δ1-157-URA3/ura3Δ sec3Δ::HIS1/sec3Δ::ARG4* | This study |
| LC126 | LC101 | *EXO84-3GFP-sec3Δ1-157-URA3/ura3Δ sec3Δ::HIS1/sec3Δ::ARG4* | This study |
| LC127 | LC101 | *SEC5-3GFP-sec3Δ317-790-URA3/ura3Δ sec3Δ::HIS1/sec3Δ::ARG4* | This study |
| LC128 | LC101 | *SEC8-3GFP-sec3Δ317-790-URA3/ura3Δ sec3Δ::HIS1/sec3Δ::ARG4* | This study |
| LC129 | LC101 | *EXO70-3GFP-sec3Δ317-790-URA3/ura3Δ sec3Δ::HIS1/sec3Δ::ARG4* | This study |
| LC130 | LC101 | *EXO84-3GFP-sec3Δ317-790-URA3/ura3Δ sec3Δ::HIS1/sec3Δ::ARG4* | This study |
| LC131 | BWP17 | *SEC3-3GFP-URA3/ura3Δ his1Δ/his1Δ arg4Δ/arg4Δ* | This study |
| LC132 | LC101 | *sec3Δ1-316-3GFP-URA3/ura3Δ sec3Δ::HIS1/sec3Δ::ARG4* | This study |
| LC133 | LC101 | *sec3Δ1-157-3GFP-URA3/ura3Δ sec3Δ::HIS1/sec3Δ::ARG4* | This study |
| LC134 | LC101 | *sec3Δ317-790-3GFP-URA3/ura3Δ sec3Δ::HIS1/sec3Δ::ARG4* | This study |
| LC135 | LC108 | *SEC3-3GFP-URA3/ura3Δ rho1::HIS1-rho1G18V/rho1Δ::ARG4* | This study |
| LC136 | LC108 | *SEC5-3GFP-URA3/ura3Δ rho1::HIS1-rho1G18V/rho1Δ::ARG4* | This study |
| LC137 | LC108 | *SEC8-3GFP-URA3/ura3Δ rho1::HIS1-rho1G18V/rho1Δ::ARG4* | This study |
| LC138 | LC108 | *EXO70-3GFP-URA3/ura3Δ rho1::HIS1-rho1G18V/rho1Δ::ARG4* | This study |
| LC139 | LC108 | *EXO84-3GFP-URA3/ura3Δ rho1::HIS1-rho1G18V/rho1Δ::ARG4* | This study |
| LC140 | LC109 | *SEC3-3GFP-URA3/ura3Δ rho1::HIS1-rho1D124A/rho1Δ::ARG4* | This study |
| LC141 | LC109 | *SEC5-3GFP-URA3/ura3Δ rho1::HIS1-rho1D124A/rho1Δ::ARG4* | This study |
| LC142 | LC109 | *SEC8-3GFP-URA3/ura3Δ rho1::HIS1-rho1D124A/rho1Δ::ARG4* | This study |
| LC143 | LC109 | *EXO70-3GFP-URA3/ura3Δ rho1::HIS1-rho1D124A/rho1Δ::ARG4* | This study |
| LC144 | LC109 | *EXO84-3GFP-URA3/ura3Δ rho1::HIS1-rho1D124A/rho1Δ::ARG4* | This study |
| LC145 | BWP17 | *SEC3-6MYC-URA3/ura3Δ his1Δ/his1Δ arg4Δ/arg4Δ* | This study |
| LC146 | BWP17 | *ura3Δ/ura3Δ his1Δ/his1Δ CDC42/cdc42Δ::ARG4* | This study |
| LC147 | LC145 | *ura3Δ/ura3Δ rho1::HIS1-cdc42G12V/cdc42Δ::ARG4* | This study |
| LC148 | LC145 | *ura3Δ/ura3Δ rho1::HIS1-cdc42D118A/cdc42Δ::ARG4* | This study |
| LC149 | LC145 | *CDC42-URA3/ura3Δ cdc42::HIS1/cdc42Δ::ARG4* | This study |
| LC150 | BWP17 | *ura3Δ/ura3Δ his1Δ/his1Δ CDC28/cdc28Δ::ARG4* | This study |
| LC151 | LC149 | *ura3Δ/ura3Δ cdc28::HIS1-cdc28F85G/cdc28Δ::ARG4* | This study |
| LC152 | LC146 | *SEC3-3GFP-URA3/ura3Δ cdc42::HIS1-cdc42G12V/cdc42Δ::ARG4* | This study |
| LC153 | LC146 | *SEC5-3GFP-URA3/ura3Δ cdc42::HIS1-cdc42G12V/cdc42Δ::ARG4* | This study |
| LC154 | LC146 | *EXO70-3GFP-URA3/ura3Δ cdc42::HIS1-cdc42G12V/cdc42Δ::ARG4* | This study |
| LC155 | LC146 | *EXO84-3GFP-URA3/ura3Δ cdc42::HIS1-cdc42G12V/cdc42Δ::ARG4* | This study |
| LC156 | LC147 | *SEC3-3GFP-URA3/ura3Δ cdc42::HIS1-cdc42D118A/cdc42Δ::ARG4* | This study |
| LC157 | LC147 | *SEC5-3GFP-URA3/ura3Δ cdc42::HIS1-cdc42D118A/cdc42Δ::ARG4* | This study |
| LC158 | LC147 | *EXO70-3GFP-URA3/ura3Δ cdc42::HIS1-cdc42D118A/cdc42Δ::ARG4* | This study |
| LC159 | LC147 | *EXO84-3GFP-URA3/ura3Δ cdc42::HIS1-cdc42D118A/cdc42Δ::ARG4* | This study |
| LC160 | LC150 | *SEC3-6MYC-URA3/ura3Δ cdc28::HIS1-cdc28F85G/cdc28Δ::ARG4* | This study |

**
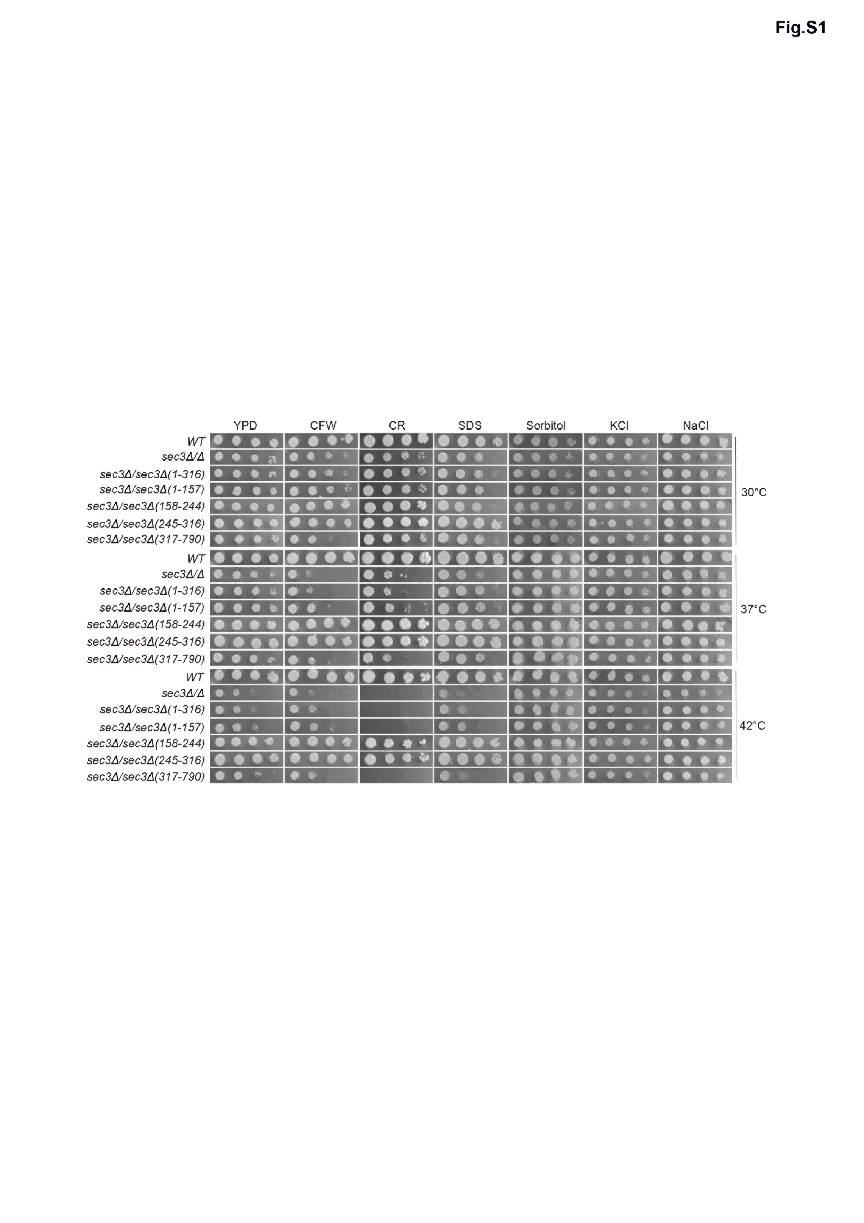
**

**Fig. S1. *sec3* mutants exhibit growth defects, are sensitive to cell wall antagonists and rescued by osmotic stabilizer.**

Cells of wild type (BWP17), *sec3Δ/Δ*, *sec3Δ/sec3Δ(1-316)*, *sec3Δ/sec3Δ(1-157)*, *sec3Δ/sec3Δ(158-244)*,*sec3Δ/sec3Δ(245-316)* and *sec3Δ/sec3Δ(317-790)* mutants were grown to log phase in YPD at 30°C. Equal densities of wild-type and mutant cells were spotted in 10-fold serial dilutions from left to right on YPD plates containing 30 μg/ml CFW, 300 μg/ml Congo Red (CR), 0.01% SDS, 1.2 M Sorbitol, 1 M KCl, or 1 M NaCl. All plates were supplemented with 100 μg/ml Uridine and incubated at 30℃, 37℃, or 42℃, respectively. Shown were images of plates taken after 3 days of incubation at the indicated temperatures.


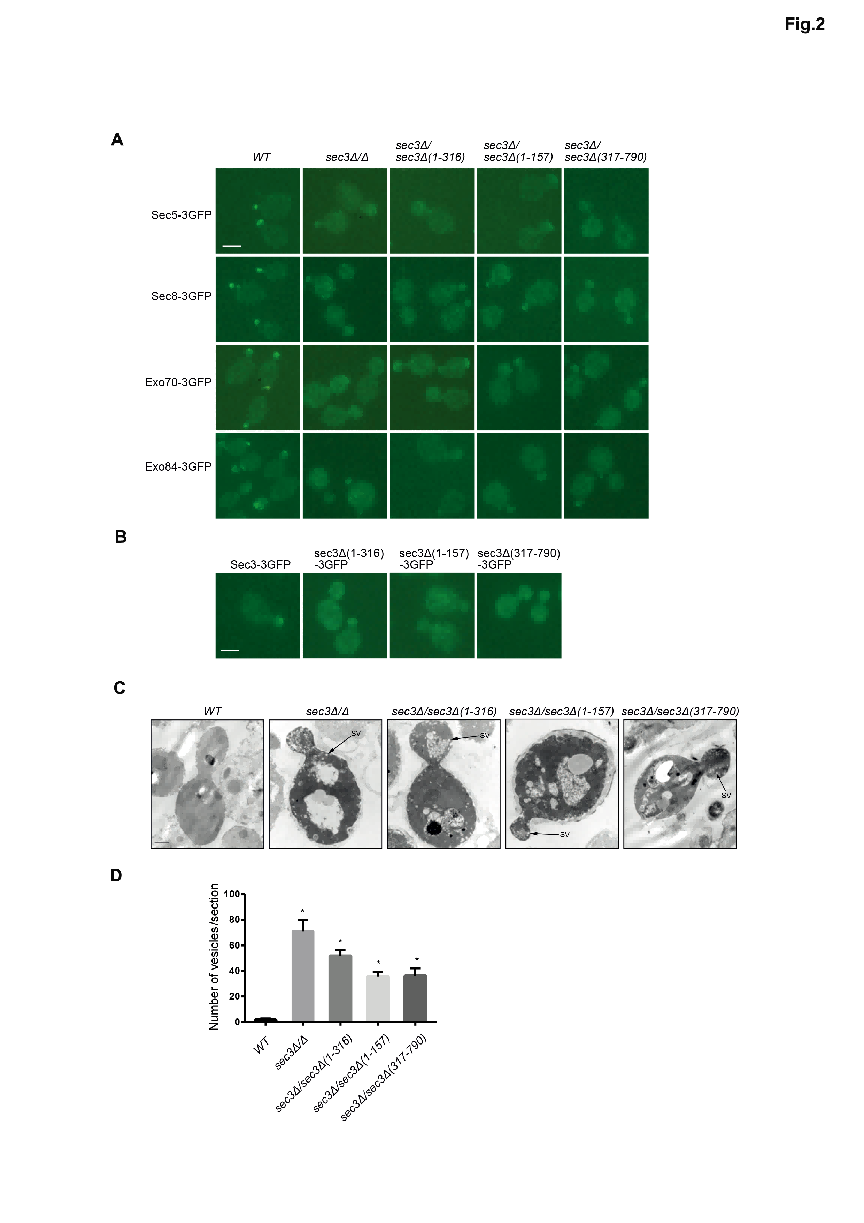


**Fig. S2. Cell lysis of *sec3* mutants.**

(A) Equal densities of wild-type (BWP17), *sec3Δ/Δ*, *sec3Δ/sec3Δ(1-316)*, *sec3Δ/sec3Δ(1-157)* and *sec3Δ/sec3Δ(317-790)* strains were loaded onto YPD plates or a YPD plate containing 1.2 M sorbitol, incubated at 30°C for 1 day, and then shifted to 30°C, 37°C, or 42°C for another day. The cells were assayed *in situ* for release of alkaline phosphatase as an indication of cell lysis.

(B) wild-type (BWP17), *sec3Δ/Δ*, *sec3Δ/sec3Δ(1-316)*, *sec3Δ/sec3Δ(1-157)* and *sec3Δ/sec3Δ(317-790)* strains were grown to early log phase at 30°C overnight and then shift to 42°C for 11h. Cells were stained with 0.4% Loeffler's Methylene Blue stain solution and examined by light microscopy. Scale bar, 10 μm.

(C) Number of lysed cells at 42°C in (B) were quantified. The assay was performed 3 times independently and 400 cells were quantified for each strain.


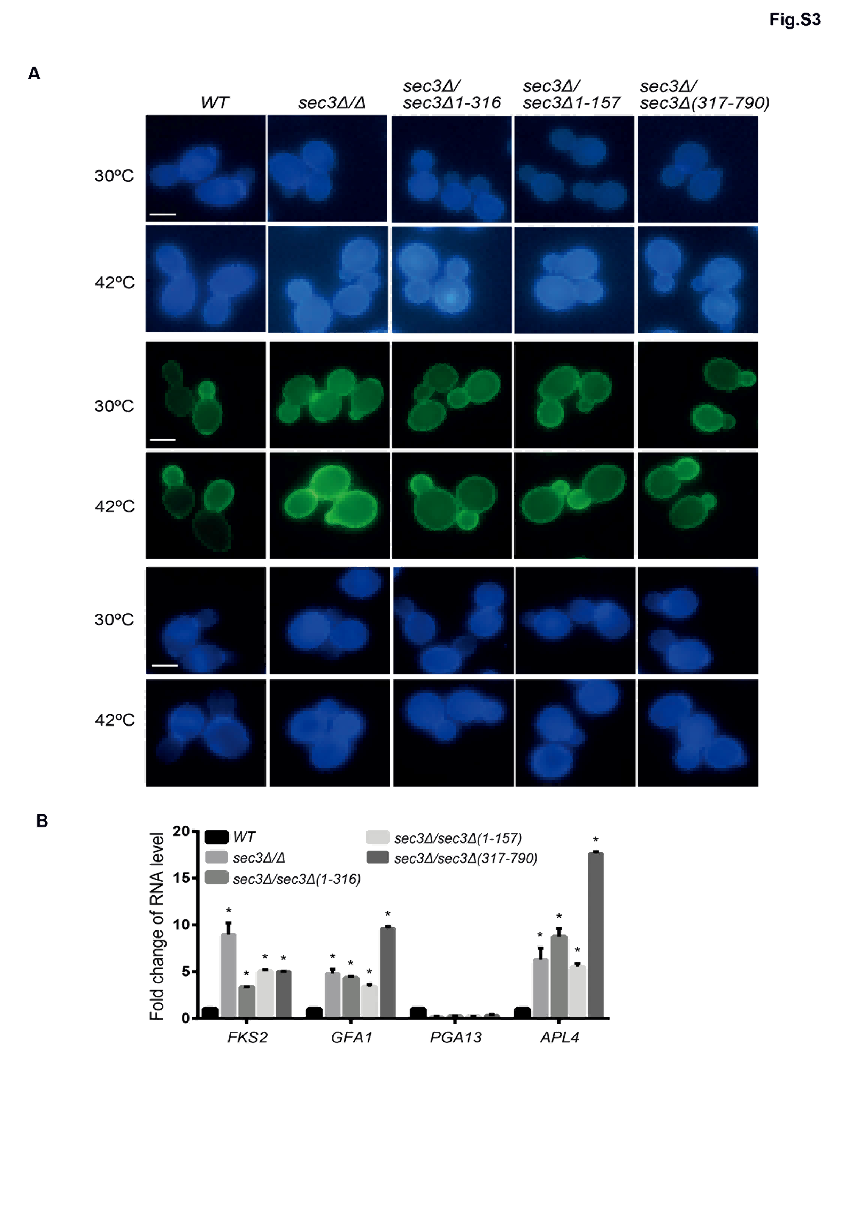


**Fig. S3. Increased cell wall components in *sec3* mutants.**

(A)Wild-type (BWP17), *sec3Δ/Δ*, *sec3Δ/sec3Δ(1-316)*, *sec3Δ/sec3Δ(1-157)* and *sec3Δ/sec3Δ(317-790)* strains were incubated at 42°C for 2 h. 1,3- β-glucan, mannoproteins, and chitin were stained with aniline blue, calcofluor white, or FITC-Con A, respectively. Cells were fixed and examined under a fluorescence microscopy. Scale bar, 5 μm. PH, phase; FL, fluorescence.

(B) The CWI signaling pathway was activated in *sec3* mutants. After wild-type (BWP17), *sec3Δ/Δ*, *sec3Δ/sec3Δ(1-316)*, *sec3Δ/sec3Δ(1-157)* and *sec3Δ/sec3Δ(317-790)* were incubated at 42°C for 2 h. Total RNA was extracted and RT-qPCR was used to detect the transcription level of *FKS2*, *PGA13*, *APL4*, and *GFA1*. Relative transcript levels were calculated using the 2-ΔΔCt method and the results are presented as histograms. *, *p* < 0.05. n=3.

**
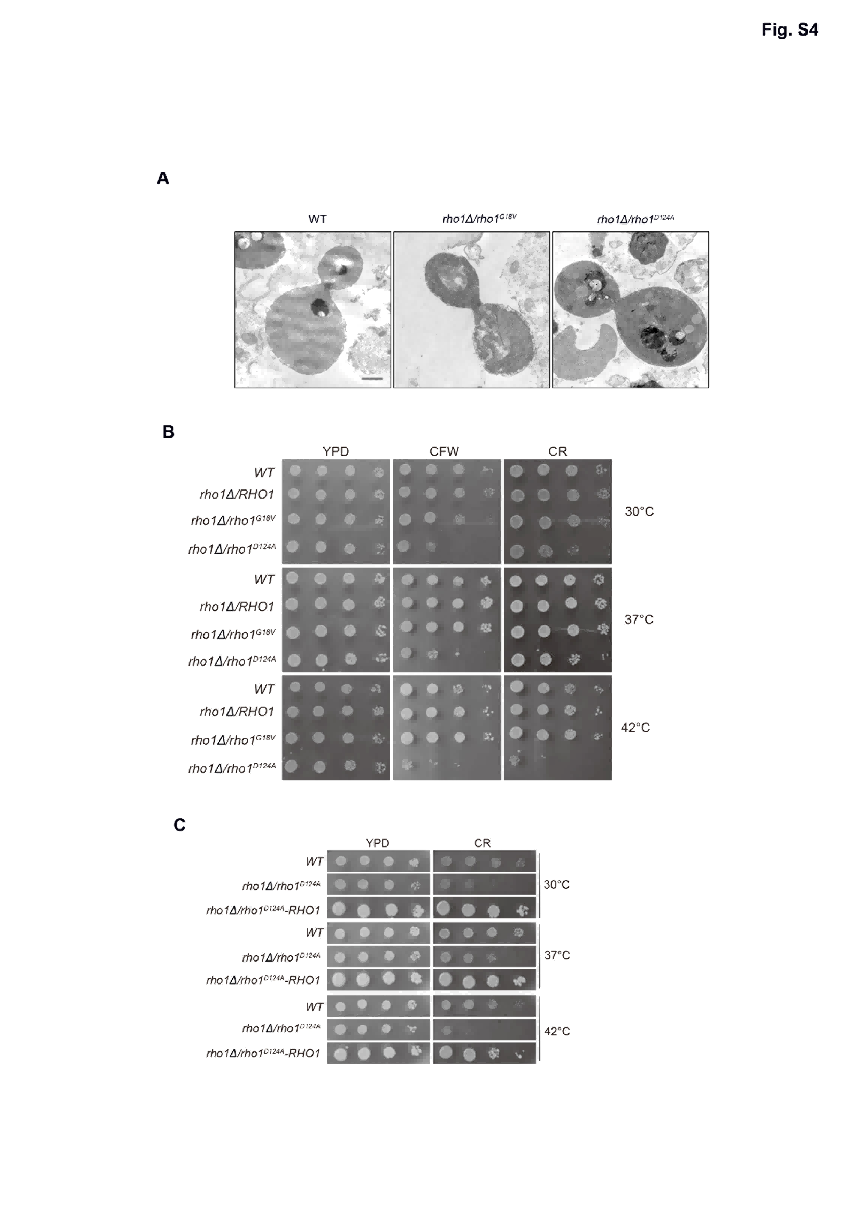
**

**Fig. S4. Secretory vesicles were not accumulated in rho1 mutant cells at restrictive temperature and the cell wall of rho1 mutant cells were not integrity.**

(A)Secretory vesicles were not accumulated in rho1 mutant cells at restrictive temperature. Wild-type (BWP17), *rho1Δ/rho1G18V*and *rho1Δ/rho1D124A* strains were grown to early log phase in YPD liquid medium overnight at 30°C and then shifted to 42°C for 90 min. The cells were mixed, stained, and examined by thin-section electron microscopy. Scale bar, 1μm.

(B) *rho1Δ/rho1D124A*mutant is sensitive to cell wall antagonists. Cells of wild type (BWP17), *rho1Δ/RHO1*, *rho1Δ/rho1G18V*, and *rho1Δ/rho1D124A*strains were grown to log phase in YPD at 30°C. Equal densities of wild-type and mutant cells were spotted in 10-fold serial dilutions from left to right on YPD or YPD plates containing 30μg/ml CFW or 300μg/ml Congo Red (CR). All plates were supplemented with 100μg/ml Uridine and incubated at 30℃, 37℃, or 42℃, respectively. Shown were images of plates taken after 3 days of incubation at the indicated temperatures.

(C) Replenishment of the wild-type RHO1 gene can inhibit the sensitivity of *rho1Δ/rho1D124A* to cell wall antagonists. Cells of wild type (BWP17), *rho1Δ/rho1D124A*, and *rho1Δ//rho1D124A-RHO1* strains were grown to log phase in YPD at 30°C. Equal densities of wild-type and mutant cells were spotted in 10-fold serial dilutions from left to right on YPD or YPD plates containing 300 μg/ml Congo Red (CR). All plates were supplemented with 100 μg/ml Uridine and incubated at 30℃, 37℃, or 42℃, respectively. Shown were images of plates taken after 3 days of incubation at the indicated temperatures.


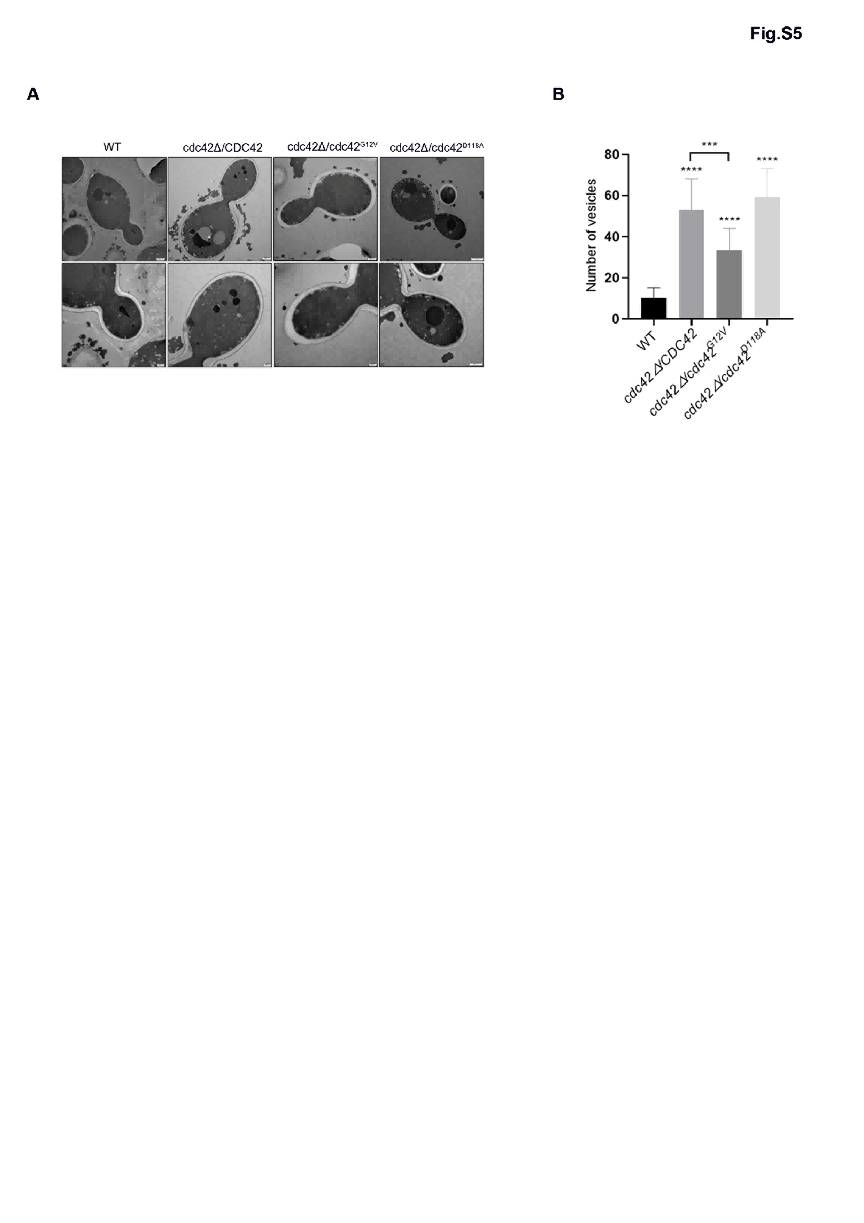


**Fig. S5. Secretory vesicles were accumulated in *cdc42* mutant cells at restrictive temperature**.

1. Wild-type (BWP17), *cdc42Δ/CDC42, cdc42Δ/cdc42G12V*and *cdc42Δ/cdc42D118A* strains were grown to early log phase in YPD liquid medium overnight at 30°C and then shifted to 42°C for 90 min. The cells were mixed, stained, and examined by thin-section electron microscopy. Scale bar for the first row, 500nm. Scale bar for the second row, 200nm.
2. Statistical analysis of vesicle accumulation in cells in (A). n=15. *, p<0.01.





**Fig. S6. Identification of Phosphorylation Sites on Sec3**.

MS analyses of Sec3-6Myc proteins Myc-purified from hyphae. The phosphopeptides which contains CDK phosphorylation sites from amino acid are shown. Arrows indicate phosphoserine and phosphorthreonine residues.
